# Supplementary material
Source: PubMed Central journal article supplement (PMC3949441)
Supplement: Supp_Table1.pdf [file Supp_Table1.pdf]

## Supplementary Data

SUPPLEMENTARY TABLE S1. PRIMERS FOR CONSTRUCTION OF PLASMIDS  
FOR VALIDATION OF miR-19/Smad4 INTERACTION

---

|                   |                                                                 |
|-------------------|-----------------------------------------------------------------|
| Smad4 wt/ miR-19  |                                                                 |
| Sense             | 5'-TCG AGT AGC GGC CGC TAG TTT AAA ATG CTT TCC TTT TGC ACT T-3' |
| Antisense         | 5'-CTA GAA GTG CAA AAG GAA AGC ATT TTA AAC TAG CGG CCG CTA C-3' |
| Smad4 mut/ miR-19 |                                                                 |
| Sense             | 5'-TCG AGT AGC GGC CGC TAG TTT AAA Atc gTT TCC TTT acg tgT T-3' |
| Antisense         | 5'-CTA GAA cac gtA AAG GAA Acg ATT TTA AAC TAG CGC CTA C-3'     |

---
